# Supplementary material
Source: publisher figshare collection journal article supplement (https://tandf.figshare.com/articles/dataset/_/8221892)
Supplement: Supplementary file 1 [file 1]

Archive with 2 entries (2 files):
- fjds_a_1618449_sm4079.xlsx
- fjds_a_1618449_sm1308.pdf
