# Supplementary material
Source: publisher figshare collection journal article supplement (https://tandf.figshare.com/articles/dataset/_/8221892)
Supplement: Supplementary file 1 [file 1 › fjds_a_1618449_sm1308.pdf]

## Supplementary Materials

Table A1: Year of birth exposed to U.S. bombing during primary school age

| Year of Birth | Age in 1969 | Age in 1973 | Age in 1975 | Age in 1979 | Treat=1 |                    |
|---------------|-------------|-------------|-------------|-------------|---------|--------------------|
| 1950          | 19          | 23          | 25          | 29          | 0       | Not exposed        |
| 1951          | 18          | 22          | 24          | 28          | 0       |                    |
| 1952          | 17          | 21          | 23          | 27          | 0       |                    |
| 1953          | 16          | 20          | 22          | 26          | 0       |                    |
| 1954          | 15          | 19          | 21          | 25          | 0       |                    |
| 1955          | 14          | 18          | 20          | 24          | 0       |                    |
| 1956          | 13          | 17          | 19          | 23          | 0       |                    |
| 1957          | 12          | 16          | 18          | 22          | 1       | U.S. Bombing       |
| 1958          | 11          | 15          | 17          | 21          | 1       |                    |
| 1959          | 10          | 14          | 16          | 20          | 1       |                    |
| 1960          | 9           | 13          | 15          | 19          | 1       |                    |
| 1961          | 8           | 12          | 14          | 18          | 1       |                    |
| 1962          | 7           | 11          | 13          | 17          | 1       |                    |
| 1963          | 6           | 10          | 12          | 16          | 1       | Bombing & genocide |
| 1964          | 5           | 9           | 11          | 15          | 1       |                    |
| 1965          | 4           | 8           | 10          | 14          | 1       |                    |
| 1966          | 3           | 7           | 9           | 13          | 1       |                    |
| 1967          | 2           | 6           | 8           | 12          | 1       | Genocide           |
| 1968          | 1           | 5           | 7           | 11          | 1       |                    |
| 1969          | 0           | 4           | 6           | 10          | 1       |                    |
| 1970          | -           | 3           | 5           | 9           | 1       |                    |
| 1971          | -           | 2           | 4           | 8           | 1       |                    |
| 1972          | -           | 1           | 3           | 7           | 1       |                    |

Table A2: Correlation between U.S. bombing and distance to Cambodia-Vietnam border

|                                          | U.S. Bombing in Metric Tons |                        |                       |
|------------------------------------------|-----------------------------|------------------------|-----------------------|
|                                          | (1)                         | (2)                    | (3)                   |
| Distance to Ho Chi Minh city (kilometer) | -0.0829***<br>(0.0155)      | -0.0825***<br>(0.0154) | -0.1726*<br>(0.0933)  |
| Constant                                 | 39.1872***<br>(5.8751)      | 31.8935***<br>(6.2392) | 88.8416*<br>(48.0652) |
| Observations                             | 160                         | 160                    | 160                   |
| R-squared                                | 0.1695                      | 0.1830                 | 0.3254                |
| Region fixed effects                     | No                          | Yes                    | No                    |
| Province fixed effects                   | No                          | No                     | Yes                   |

Note: Robust standard errors are in parentheses. Each specification includes district fixed effects, and the sample is restricted to individuals aged between 17 and 57. \*\*\* Significant at 1%; \*\* significant at 5%; \* significant at 10%.

Table A3: Impact of U.S. bombing across distance on individuals too old to be affected

|                          | CSES Full sample |            | CSES Earning Sample |              | DHS household sample<br>(2000, 2005, 2010) |           | DHS women sample (2000) |           |            |            |             |             |
|--------------------------|------------------|------------|---------------------|--------------|--------------------------------------------|-----------|-------------------------|-----------|------------|------------|-------------|-------------|
|                          | Education        |            | Education           |              | Education                                  |           | Fertility               | Marriage  |            | Height     |             |             |
|                          | (1)              | (2)        | (3)                 | (4)          | (5)                                        | (6)       | (7)                     | (8)       | (9)        | (10)       | (11)        | (12)        |
| U.S. bomb (=1 if bomb>0) | -0.1005          |            | -0.0932             |              | -0.1414                                    | -0.0004   | 0.3344                  | 0.0006    | -0.0496    | -0.0015    | -0.0632     | -0.0012     |
|                          | (0.4280)         |            | (0.4493)            |              | (0.1043)                                   | (0.0003)  | (0.3440)                | (0.0009)  | (0.4001)   | (0.0011)   | (0.6158)    | (0.0018)    |
| Bomb*distance to border  |                  | -0.0000    |                     | 0.0002       |                                            | -0.0002   |                         | -0.0006   |            | -0.0132*** |             | -0.0065     |
|                          |                  | (0.0010)   |                     | (0.0011)     |                                            | (0.0010)  |                         | (0.0029)  |            | (0.0043)   |             | (0.0076)    |
| Distance to border       |                  | 0.0001     |                     | 0.0003       |                                            |           |                         |           |            |            |             |             |
|                          |                  | (0.0011)   |                     | (0.0015)     |                                            |           |                         |           |            |            |             |             |
| Constant                 | 513.1753         | 509.5437   | -730.4076***        | -670.9388*** | 54.2924                                    | 54.4734   | 6.1341***               | 6.4762*** | 19.6423*** | 23.5229*** | 152.0122*** | 154.0313*** |
|                          | (383.7995)       | (383.4902) | (271.4280)          | (228.0331)   | (40.1897)                                  | (40.2388) | (0.3955)                | (0.8555)  | (0.4581)   | (1.2689)   | (1.4452)    | (2.5807)    |
| Observations             | 6,640            | 6,640      | 2,477               | 2,477        | 6,307                                      | 6,307     | 1,500                   | 1,500     | 1,500      | 1,500      | 872         | 872         |
| R-squared                | 0.0803           | 0.0802     | 0.1472              | 0.1472       | 0.0251                                     | 0.0252    | 0.0359                  | 0.0357    | 0.0152     | 0.0202     | 0.0393      | 0.0397      |
| District fixed effects   | Yes              | Yes        | Yes                 | Yes          | Yes                                        | Yes       | Yes                     | Yes       | Yes        | Yes        | Yes         | Yes         |

Note: Standard errors are clustered at the district level. Each specification includes district fixed effects and the sample is restricted to individuals aged between 17 and 57. \*\*\* Significant at 1%; \*\* significant at 5%; \* significant at 10%. Individuals who are too old refer to those who were born between 1950 and 1955 for education, fertility and marriage outcomes, while individuals who were old for height are those born between 1960 and 1964.

Table A4: Impact of U.S. bombing on years of schooling, controlling for zone-specific trend.

|                         | CSES Full sample      |                        | CSES Earning Sample   |                       | DHS sample (2000, 2005, 2010) |                        | DHS sample (2000)       |                       |
|-------------------------|-----------------------|------------------------|-----------------------|-----------------------|-------------------------------|------------------------|-------------------------|-----------------------|
|                         | (1)                   | (2)                    | (3)                   | (4)                   | (5)                           | (6)                    | (7)                     | (8)                   |
|                         | Education             | Education              | Education             | Education             | Education                     | Education              | Fertility               | Age at first marriage |
| Bomb*born 1957-1962     | -0.0046**<br>(0.0022) | -0.0015<br>(0.0020)    | -0.0088**<br>(0.0037) | -0.0032<br>(0.0047)   | -0.0054**<br>(0.0026)         | -0.0001<br>(0.0026)    | 0.0098**<br>(0.0041)    | -0.0124<br>(0.0079)   |
| Bomb*born 1957-1962*sex |                       | -0.0074***<br>(0.0024) |                       | -0.0077*<br>(0.0040)  |                               | -0.0100***<br>(0.0026) |                         |                       |
| Sex (male=1)            |                       | 2.0673***<br>(0.0656)  |                       | 1.9988***<br>(0.0983) |                               | 1.9952***<br>(0.0832)  |                         |                       |
| Ethnic Khmer (Khmer=1)  |                       | 1.5368***<br>(0.1860)  |                       | 1.5458***<br>(0.3005) |                               |                        |                         |                       |
| Constant                | 3.0864***<br>(0.2799) | 0.8641***<br>(0.3080)  | 4.9427***<br>(0.5313) | 2.3530***<br>(0.6138) | 3.2741***<br>(0.3822)         | 2.4473***<br>(0.3777)  | 143.9811**<br>(62.3280) | -3.4826<br>(64.9849)  |
| Observations            | 15,473                | 15,466                 | 6,210                 | 6,210                 | 21,363                        | 21,363                 | 3,734                   | 3,734                 |
| R-squared               | 0.1184                | 0.1994                 | 0.1923                | 0.2482                | 0.1583                        | 0.2457                 | 0.1330                  | 0.0619                |
| Add zone trend          | yes                   | yes                    | yes                   | yes                   | yes                           | yes                    | yes                     | yes                   |

Table A5: Impact of U.S. bombing on education, fertility and marriage after controlling for Khmer Rouge genocide

|                                           | CSES Full sample             |                               | CSES Earning Sample           |                            | DHS household sample (2000, 2005, 2010) |                               | DHS (2000)                  |                            |
|-------------------------------------------|------------------------------|-------------------------------|-------------------------------|----------------------------|-----------------------------------------|-------------------------------|-----------------------------|----------------------------|
|                                           | Education                    | Education                     | Education                     | Education                  | Education                               | Education                     | Fertility                   | Marriage                   |
|                                           | (1)                          | (2)                           | (3)                           | (4)                        | (5)                                     | (6)                           | (7)                         | (8)                        |
| U.S. bomb*born 1957-1962                  | <b>-0.0046**</b><br>(0.0021) | -0.0021<br>(0.0019)           | <b>-0.0095***</b><br>(0.0035) | -0.0047<br>(0.0043)        | <b>-0.0052**</b><br>(0.0026)            | -0.0005<br>(0.0024)           | <b>0.0078**</b><br>(0.0037) | <b>-0.0102</b><br>(0.0080) |
| Khmer Rouge mass grave*born 1957-1962     | 0.0012<br>(0.0047)           | 0.0090**<br>(0.0045)          | 0.0047<br>(0.0118)            | 0.0156<br>(0.0133)         | -0.0028<br>(0.0029)                     | 0.0028<br>(0.0027)            | 0.0015<br>(0.0046)          | -0.0042<br>(0.0103)        |
| U.S. bomb*born 1957-1962*sex              |                              | <b>-0.0060***</b><br>(0.0022) |                               | <b>-0.0064</b><br>(0.0041) |                                         | <b>-0.0144***</b><br>(0.0050) |                             |                            |
| Khmer Rouge mass grave*born 1957-1962*sex |                              | -0.0156***<br>(0.0033)        |                               | -0.0139*<br>(0.0071)       |                                         | -0.0086***<br>(0.0024)        |                             |                            |
| Sex (1=male)                              |                              | 2.1159***<br>(0.0653)         |                               | 2.0505***<br>(0.1021)      |                                         | 2.0449***<br>(0.0845)         |                             |                            |
| Ethnic Khmer (1=Khmer)                    |                              | 1.6054***<br>(0.1913)         |                               | 1.6028***<br>(0.3088)      |                                         |                               |                             |                            |
| Constant                                  | 3.8793***<br>(0.1216)        | 1.5331***<br>(0.2190)         | 6.1959***<br>(0.4291)         | 3.5381***<br>(0.5452)      | 3.5418***<br>(0.0608)                   | 2.7162***<br>(0.0554)         | 5.9510***<br>(0.0590)       | 19.6852***<br>(0.1071)     |
| Observations                              | 15,473                       | 15,466                        | 6,210                         | 6,210                      | 21,363                                  | 21,363                        | 3,734                       | 3,734                      |
| R-squared                                 | 0.1093                       | 0.1913                        | 0.1797                        | 0.2369                     | 0.1580                                  | 0.2461                        | 0.1305                      | 0.0645                     |

Note: Standard errors are clustered at the district level. Each specification includes district fixed effects and the comparison group comprises individuals born between 1950 and 1955. \*\*\* Significant at 1%; \*\* significant at 5%; \* significant at 10%.

Table A6: Return to years of schooling (CSES 2004, 2008, 2009, 2010)

|                             | <b>Both sexes</b>      | <b>Male</b>            | <b>Female</b>          |
|-----------------------------|------------------------|------------------------|------------------------|
| <b>Log monthly earnings</b> | (1)                    | (2)                    | (3)                    |
| Education                   | 0.0731***<br>(0.0052)  | 0.0748***<br>(0.0065)  | 0.0714***<br>(0.0078)  |
| Age                         | 0.0516<br>(0.0958)     | 0.1641<br>(0.1196)     | -0.0976<br>(0.1449)    |
| Age squared                 | -0.0006<br>(0.0010)    | -0.0018<br>(0.0012)    | 0.0010<br>(0.0015)     |
| Sex (male=1)                | 0.1507***<br>(0.0368)  |                        |                        |
| Year 2004                   | -2.0962***<br>(0.0907) | -2.2275***<br>(0.1071) | -1.8930***<br>(0.1301) |
| Year 2008                   | -0.3906***<br>(0.1336) | -0.4615***<br>(0.1442) | -0.1633<br>(0.1624)    |
| Year 2009                   | -0.3512***<br>(0.0810) | -0.3836***<br>(0.0888) | -0.3334**<br>(0.1420)  |
| Constant                    | 11.0277***<br>(2.2915) | 8.6324***<br>(2.8692)  | 14.3766***<br>(3.4566) |
| Observations                | 6,210                  | 3,650                  | 2,560                  |
| R-squared                   | 0.3840                 | 0.4242                 | 0.3732                 |

Note: Standard errors are clustered at the district level. Each model includes district fixed effects and the sample is restricted to individuals aged between 17 and 57. \*\*\* Significant at 1%; \*\* significant at 5%; \* significant at 10%.

Table A7: Impact of U.S. bombing on the probability of survival of siblings

| Dummy variables       | Sibling survival       |                        | Child survival         |                        | Adult survival         |                        |
|-----------------------|------------------------|------------------------|------------------------|------------------------|------------------------|------------------------|
|                       | (1)                    | (2)                    | (3)                    | (4)                    | (5)                    | (6)                    |
| Born1957-1962         | 0.1113***<br>(0.0086)  |                        | 0.0054<br>(0.0049)     |                        | 0.1548***<br>(0.0092)  |                        |
| Bomb*Born1957-1962    | -0.0007**<br>(0.0004)  |                        | 0.0001<br>(0.0002)     |                        | -0.0004<br>(0.0003)    |                        |
| Born1965-1969         |                        | 0.0264***<br>(0.0062)  |                        | -0.0056<br>(0.0039)    |                        | 0.0239***<br>(0.0038)  |
| Bomb*Born1965-1969    |                        | 0.0000<br>(0.0002)     |                        | -0.0003***<br>(0.0001) |                        | 0.0001<br>(0.0002)     |
| Sex (female=1)        | 0.1766***<br>(0.0068)  | 0.0786***<br>(0.0056)  | 0.0103***<br>(0.0037)  | 0.0093***<br>(0.0033)  | 0.1194***<br>(0.0052)  | 0.0405***<br>(0.0036)  |
| Year 2005             | -0.0553***<br>(0.0118) | -0.0478***<br>(0.0096) | -0.0143***<br>(0.0053) | -0.0180***<br>(0.0053) | -0.0394***<br>(0.0074) | -0.0291***<br>(0.0033) |
| Year 2010             | -0.0553***<br>(0.0118) | -0.0478***<br>(0.0096) | -0.0143***<br>(0.0053) | -0.0180***<br>(0.0053) | -0.0394***<br>(0.0074) | -0.0291***<br>(0.0033) |
| Constant              | 0.5657***<br>(0.0093)  | 0.7485***<br>(0.0065)  | 0.9417***<br>(0.0040)  | 0.9449***<br>(0.0035)  | 0.6928***<br>(0.0072)  | 0.9152***<br>(0.0032)  |
| Observations          | 37,002                 | 50,312                 | 37,002                 | 50,312                 | 37,002                 | 50,312                 |
| R-squared             | 0.0661                 | 0.0286                 | 0.0216                 | 0.0178                 | 0.0746                 | 0.0206                 |
| District fixed effect | yes                    | yes                    | yes                    | yes                    | yes                    | yes                    |

Note: Standard errors are clustered at the district level. The comparison group for individuals born during 1957-1962 consists of those born between 1950 and 1955, while the comparison group for individuals born during 1965-1969 consists of those born during 1960-1964. \*\*\* Significant at 1%; \*\* significant at 5%; \* significant at 10%.
