# Supplementary material
Source: publisher figshare collection journal article supplement (https://tandf.figshare.com/articles/dataset/_/8221892)
Supplement: Supplementary file 1 [file 1 › fjds_a_1618449_sm4079.xlsx]

## Sheet: Sheet1
	Full sample		Earning sample
	(1)	(2)	(3)	(4)
VARIABLES	Education	Education	Education	Education
Bomb*Born 1957-1962	-0.0025	-0.0012	-0.0087*	-0.0059
	(0.0041)	(0.0040)	(0.0047)	(0.0051)
Bomb*Born 1957-1962*Asset Q2	-0.0016	-0.0008	0.0047	0.0058
	(0.0041)	(0.0042)	(0.0047)	(0.0046)
Bomb*Born 1957-1962*Asset Q3	0.0021	0.0025	-0.0022	-0.0008
	(0.0037)	(0.0035)	(0.0052)	(0.0048)
Bomb*Born 1957-1962*Asset Q4	-0.0028	-0.0016	0.0000	0.0015
	(0.0049)	(0.0048)	(0.0066)	(0.0065)
Bomb*Born 1957-1962*Asset Q5	-0.0069	-0.0034	0.0013	0.0053
	(0.0050)	(0.0054)	(0.0078)	(0.0081)
Asset Quintile 2	0.1846**	0.2139**	-0.0899	0.0431
	(0.0863)	(0.0869)	(0.1439)	(0.1438)
Asset Quintile 3	0.8678***	0.8373***	1.0247***	1.0203***
	(0.0900)	(0.0847)	(0.1715)	(0.1656)
Asset Quintile 4	1.5658***	1.4720***	1.7333***	1.6426***
	(0.1026)	(0.0992)	(0.1624)	(0.1630)
Asset Quintile 5	3.3877***	3.2013***	3.9139***	3.7106***
	(0.1485)	(0.1475)	(0.2547)	(0.2479)
Bomb*Born 1957-1962*Sex		-0.0061***		-0.0061*
		(0.0021)		(0.0037)
Sex		1.9422***		1.7760***
		(0.0634)		(0.0952)
Ethnic Khmer (=1)		1.5253***		1.5197***
		(0.1727)		(0.2555)
Constant	2.7280***	0.5817***	4.5236***	2.1522***
	(0.1149)	(0.2024)	(0.3182)	(0.3974)
Observations	15,471	15,464	6,210	6,210
R-squared	0.1932	0.2657	0.2764	0.3210
Robust standard errors in parentheses
*** p<0.01, ** p<0.05, * p<0.1
